# Supplementary material for: The Breeding of High-Quality Dandelions by NaCl Induced Callus Variation Combined with a Drosophila Tumor Cell Migration Test
Source: MDPI journal article supplement (doi:10.3390/horticulturae8121167), 2022-12-08
Supplement: s1 [file s1]

Archive with 2 entries (2 files):
- S Figures.pdf
- S Tables.pdf
