# Supplementary material for: The Breeding of High-Quality Dandelions by NaCl Induced Callus Variation Combined with a Drosophila Tumor Cell Migration Test
Source: MDPI journal article supplement (doi:10.3390/horticulturae8121167), 2022-12-08
Supplement: s1 [file s1 › S Figures.pdf]

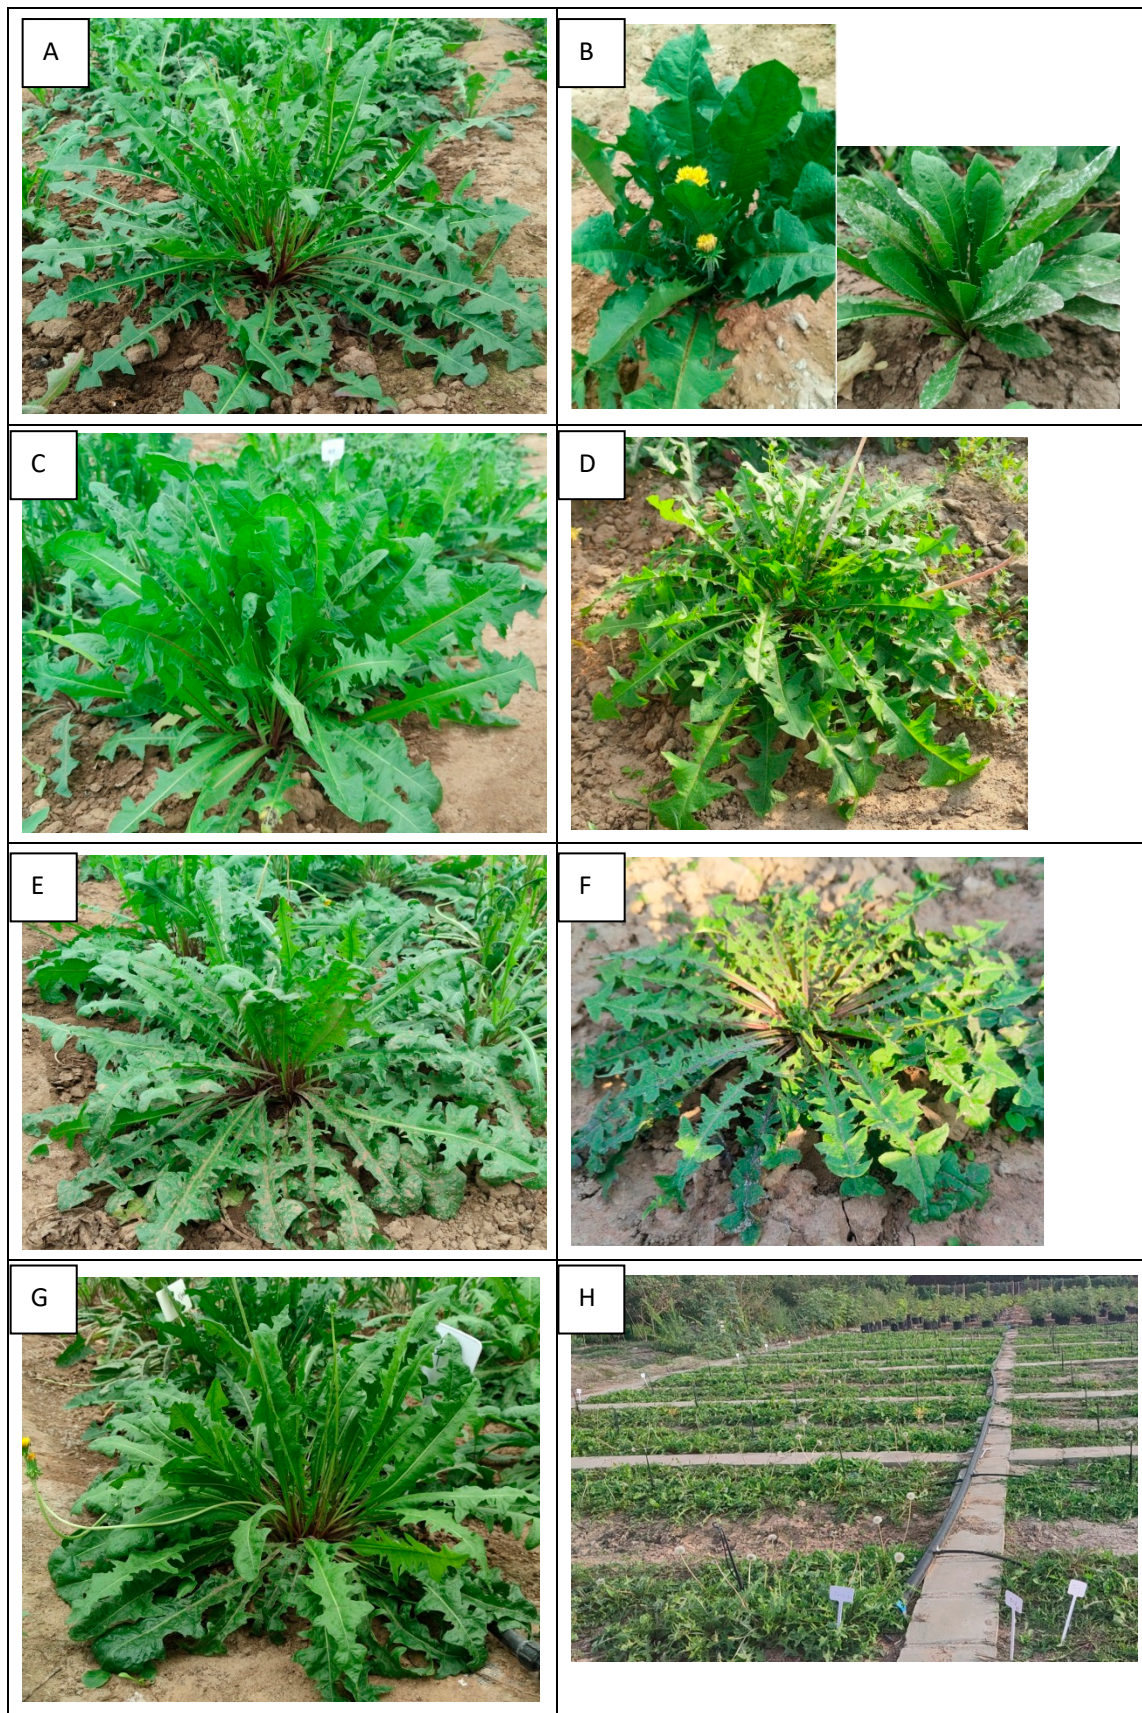

**Figure S1.** Progenies of dandelion tissue culture plantlets grown on saline-alkali land. Panels A to F show phenotypes of lines obtained from treatments Y1 to Y6, respectively. Panel G show a parental line ("Daye"). Panel H show the observation nursery.

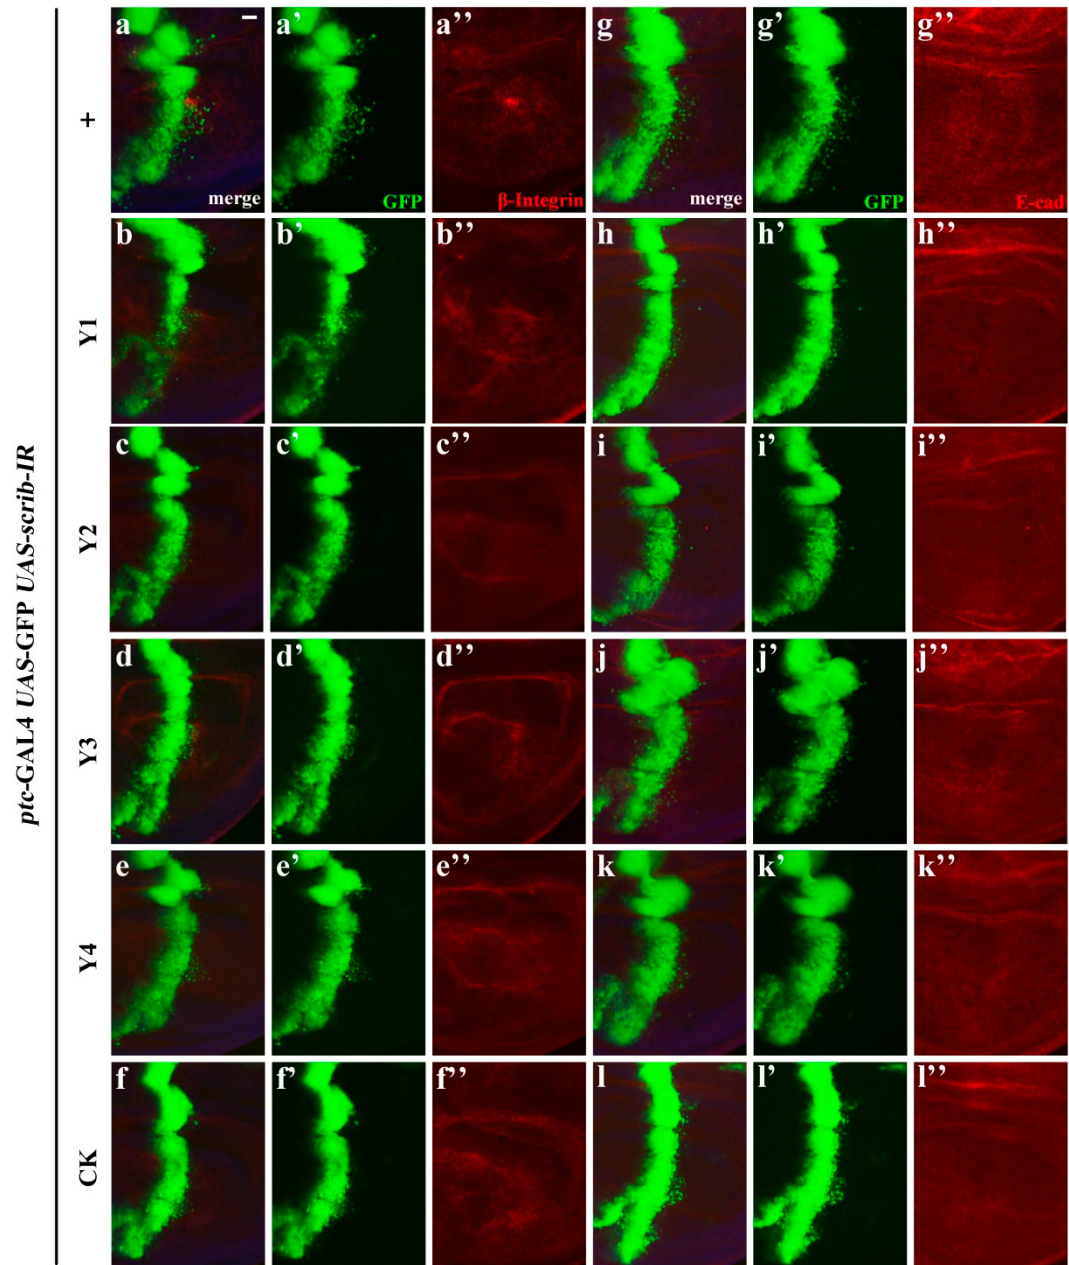

**Figure S2.** Dandelion extract suppresses  $\beta$ -integrin accumulation and reduced E-cadherin level induced by loss of scrib. Fluorescence micrographs of third-instar larval wing discs stained with anti- $\beta$ -integrin (red) (a-f) or anti-E-cadherin (cad) antibody (red) (g-l) were shown. Scale bar: 20  $\mu$ m (a-k).
