# Supplementary material for: The Breeding of High-Quality Dandelions by NaCl Induced Callus Variation Combined with a Drosophila Tumor Cell Migration Test
Source: MDPI journal article supplement (doi:10.3390/horticulturae8121167), 2022-12-08
Supplement: s1 [file s1 › S Tables.pdf]

**Table S1** PCR primers information

| Name   | Sequence    | Name | Sequence   |
|--------|-------------|------|------------|
| OPD-05 | TGAGCGGACA  | S374 | CCCGCTACAC |
| OPA-19 | CAAACGTCGG  | S375 | CTCCTGCCAA |
| S36    | AGCCAGCGAA  | S376 | GAGCGTCGAA |
| S308   | CAGGGGTGGA  | S391 | ACGATGAGCC |
| S358   | TGGTCGCAGA  | S392 | GGGCGGTACT |
| S224   | CCCCTCACGA  | S393 | ACCGCCTGCT |
| S262   | ACCCCGCCAA  | S394 | GTGACAGGCT |
| S267   | CTGGACGTCA  | S252 | TCACCAGCCA |
| OPG-06 | GTGCCTAACC  | S253 | GGCTGGTTCC |
| SJ4    | CCGCTACCGA  | S254 | TGGGTCCCTC |
| OPC-11 | ACGATGAGCC  | S331 | CTCAGTCGCA |
| OPB-12 | CCTTGACGCA  | S332 | TCAACGGGAC |
| S90    | AGGGCCGTCT  | S333 | GACTAAGCCC |
| S309   | GGTCTGGTTG  | S334 | TCGGAGGTTC |
| S266   | AGGCCCCGATG | S335 | CAGGGCTTTC |
| S268   | GACTGCCTCT  | S336 | TCCCCATCAC |
| S269   | GTGACCGAGT  | S337 | CCTTCCCACT |
| S270   | TCGCATCCCT  | S338 | AGGGTCTGTG |
| S371   | AATGCCCCAG  | S339 | GTGCGAGCAA |
| S372   | TGGCCCTCAC  | S340 | ACTTTGGCGG |
| S373   | GGTTGTACCC  |      |            |
